# Supplementary material for: Effect of cotton residues incorporation on soil properties, organic nitrogen fractions, and nitrogen-mineralizing enzyme activity under long-term continuous cotton cropping
Source: PeerJ. 2021 Apr 7;9:e11053. doi: 10.7717/peerj.11053 (PMC8035904; doi:10.7717/peerj.11053)
Supplement: Data S1 — Data from Figs. 1–2 and Tables 1–3. [file peerj-09-11053-s001.xls]

## Sheet: Table1 
	Table 1 Changes of soil properties in 0-40 cm soil depth after long-term continuous cropping and cotton residues incorporation.
	Cmic						Nmic						Cmic/Nmic
Treatment	Average	Deviation	Significance	mg kg-1		Treatment	Average	Deviation	Significance	mg kg-1		Treatment	Average	Deviation	Significance
5a	83.8806	5.21	d	83.88±5.21d		5a	18.5	0.832	d	18.5±0.83d		5a	4.57	0.36	ab	4.57±0.36ab
10a	127.537	8.35	b	127.54±8.35b		10a	29.4091	2.611	b	29.41±2.61b		10a	4.36	0.78	ab	4.36±0.78ab
15a	110.746	8.26	c	110.75±8.26c		15a	25.9	4.48	c	25.9±4.48c		15a	4.29	1.15	ab	4.29±1.15ab
20a	151.045	10.38	a	151.04±10.38a		20a	35.5455	6.5	a	35.55±6.5a		20a	4.19	0.22	b	4.19±0.22b
CK5	80.5224	3.67	d	80.52±3.67d		CK5	17.8182	3.33	d	17.82±3.33d		CK5	4.54	0.73	ab	4.54±0.73ab
CK10	77.1642	4.88	de	77.16±4.88de		CK10	16.9364	6.2	de	16.94±6.2de		CK10	4.58	0.8	ab	4.58±0.8ab
CK20	67.0896	5.12	e	67.09±5.12e		CK20	14.4091	3.52	e	14.41±3.52e		CK20	4.71	0.54	a	4.71±0.54a
	TOC						TON						TOC/TON
Treatment	Average	Deviation	Significance	g kg-1		Treatment	Average	Deviation	Significance	g kg-1		Treatment	Average	Deviation	Significance
5a	10.25	0.792	c	10.25±0.79c		5a	0.508571	0.02	d	0.51±0.02d		5a	20.2145	3.21	a	20.21±3.21a
10a	10.66	3.51	c	10.66±3.51c		10a	0.598571	0.02	c	0.6±0.02c		10a	17.8691	3.71	b	17.87±3.71b
15a	11.75	3.672	b	11.75±3.67b		15a	0.638095	0.03	b	0.64±0.03b		15a	18.4842	2.57	a	18.48±2.57a
20a	12.52	2.16	a	12.52±2.16a		20a	0.691905	0.02	a	0.69±0.02a		20a	18.195	5.1	ab	18.19±5.1ab
CK5	8.73	1.611	d	8.73±1.61d		CK5	0.401429	0.04	g	0.4±0.04g		CK5	21.6973	4.18	a	21.7±4.18a
CK10	8.59	2.3	de	8.59±2.3de		CK10	0.429524	0.02	f	0.43±0.02f		CK10	19.9589	1.15	a	19.96±1.15a
CK20	7.69	2.23	e	7.69±2.23e		CK20	0.479048	0.04	e	0.48±0.04e		CK20	16.1827	1.06	b	16.18±1.06b
	SOC
Treatment	Average	Deviation	Significance	g kg-1
5a	3.44	0.51	c	3.44±0.51c
10a	4.38	0.67	b	4.38±0.67b
15a	4.27	1.02	b	4.27±1.02b
20a	4.976	0.77	a	4.98±0.77a
CK5	3.11	0.58	cd	3.11±0.58cd
CK10	2.93	0.6	d	2.93±0.6d
CK20	2.54	0.39	e	2.54±0.39e

## Sheet: Table2 
	Table 2 Concentrations of N (mg kg-1) in the various fractions in long-term continuous cropping cotton field under straw incorporation
			AAN
		Treatment	Average	Deviation	Significance	mg kg-1
		5a	99.1667	10.11	c	99.17±10.11c
		10a	134.167	5.05	b	134.17±5.05b
		15a	122.5	10.11	bc	122.5±10.11bc
		20a	151.667	10.11	a	151.67±10.11a
		CK5	78.1667	10.31	e	78.17±10.31e
		CK10	87.5	5.52	cd	87.5±5.52cd
		CK20	102.083	12.39	c	102.08±12.39c
			AN
		Treatment	Average	Deviation	Significance	mg kg-1
		5a	84.5833	6.9	c	84.58±6.9c
		10a	97.7083	2.53	c	97.71±2.53c
		15a	105	7.58	b	105±7.58b
		20a	113.75	4.38	a	113.75±4.38a
		CK5	71.4583	5.05	d	71.46±5.05d
		CK10	80.2083	5.05	cd	80.21±5.05cd
		CK20	86.0417	3.65	c	86.04±3.65c
			ASN
		Treatment	Average	Deviation	Significance	mg kg-1
		5a	26.25	3.86	cd	26.25±3.86cd
		10a	33.5417	5.05	ab	33.54±5.05ab
		15a	30.625	7.58	bc	30.63±7.58bc
		20a	37.3333	3.54	a	37.33±3.54a
		CK5	23.625	2.87	de	23.63±2.87de
		CK10	21.875	4.35	de	21.88±4.35de
		CK20	18.9583	2.53	e	18.96±2.53e
			HUN
		Treatment	Average	Deviation	Significance	mg kg-1
		5a	138.25	14.17	c	138.25±14.17c
		10a	158.667	12.75	b	158.67±12.75b
		15a	189.875	6.97	a	189.88±6.97a
		20a	182.583	15.67	a	182.58±15.67a
		CK5	104.417	19.69	d	104.42±19.69d
		CK10	110.25	10.67	d	110.25±10.67d
		CK20	123.083	16.88	cd	123.08±16.88cd
			Hydrolysable Total N
		Treatment	Average	Deviation	Significance	mg kg-1
		5a	348.25	5.52	c	348.25±5.52c
		10a	424.083	17.56	b	424.08±17.56b
		15a	448	16.33	b	448±16.33b
		20a	485.333	12.63	a	485.33±12.63a
		CK5	277.667	10.34	e	277.67±10.34e
		CK10	299.833	9.02	de	299.83±9.02de
		CK20	330.167	9.3	cd	330.17±9.3cd
			AIN
		Treatment	Average	Deviation	Significance	mg kg-1
		5a	160.321	10.22	c	160.32±10.22c
		10a	174.488	10.31	b	174.49±10.31b
		15a	190.095	12.28	ab	190.1±12.28ab
		20a	206.571	12.08	a	206.57±12.08a
		CK5	123.762	14.99	d	123.76±14.99d
		CK10	129.69	10.16	d	129.69±10.16d
		CK20	148.881	5.11	cd	148.88±5.11cd

## Sheet: Figure1 
	Figure 1 Distribution (%) of soil amino acid nitrogen (AAN), ammonium nitrogen (AN), amino sugar nitrogen (ASN), hydrolysable unidentified nitrogen (HUN), and acid insoluble nitrogen (AIN) in long-term continuous cropping cotton field under straw incorporation.
		Treatment	AAN	TON	%
		5a	99.1667	508.571	0.194991
		10a	134.167	598.571	0.224145
		15a	122.5	638.095	0.191978
		20a	151.667	691.905	0.219202
		CK5	78.1667	401.429	0.194721
		CK10	87.5	429.524	0.203714
		CK20	102.083	479.048	0.213096
		Treatment	AN	TON	%
		5a	84.5833	508.571	0.166316
		10a	97.7083	598.571	0.163236
		15a	105	638.095	0.164552
		20a	113.75	691.905	0.164401
		CK5	71.4583	401.429	0.17801
		CK10	80.2083	429.524	0.186738
		CK20	86.0417	479.048	0.17961
		Treatment	ASN	TON	%
		5a	26.25	508.571	0.0516152
		10a	33.5417	598.571	0.0560362
		15a	30.625	638.095	0.0479944
		20a	37.3333	691.905	0.0539573
		CK5	23.625	401.429	0.0588523
		CK10	21.875	429.524	0.0509285
		CK20	18.9583	479.048	0.039575
		Treatment	HUN	TON	%
		5a	138.25	508.571	0.27184
		10a	158.667	598.571	0.265076
		15a	189.875	638.095	0.297565
		20a	182.583	691.905	0.263885
		CK5	104.417	401.429	0.260113
		CK10	110.25	429.524	0.25668
		CK20	123.083	479.048	0.256933
		Treatment	AIN	TON	%
		5a	160.321	508.571	0.315239
		10a	174.488	598.571	0.291508
		15a	190.095	638.095	0.29791
		20a	206.571	691.905	0.298555
		CK5	123.762	401.429	0.308304
		CK10	129.69	429.524	0.30194
		CK20	148.881	479.048	0.310785

## Sheet: Figure2  
	Figure 2 Soil enzyme activities of protease, urease, nitrate reductase and nitrite reductase in long-term continuous cropping cotton field under straw incorporation. Error bars represent SD (n = 3). The different letters indicate significant differences (p < 0.05) between treatments.
			protease	ug/g
		Treatment	Average	Deviation	Significance
		5a	13.8799	0.335393	c
		10a	15.1996	0.496825	b
		15a	14.753	0.866083	bc
		20a	18.6256	0.702236	a
		CK5	12.4135	0.242439	d
		CK10	11.6603	0.56851	d
		CK20	9.62074	0.894546	e
			urease	ug/g
		Treatment	Average	Deviation	Significance
		5a	476.658	21.4729	b
		10a	535.703	46.4076	a
		15a	541.686	50.8604	a
		20a	550.3	24.2607	a
		CK5	432.013	22.2647	bc
		CK10	389.472	14.4822	cd
		CK20	353.9	6.83973	d
			nitrate reductase	ug/g
		Treatment	Average	Deviation	Significance
		5a	85.8108	3.37838	b
		10a	95.9459	5.16056	b
		15a	88.0631	7.03266	b
		20a	109.835	10.0933	a
		CK5	68.1682	9.44425	c
		CK10	64.7898	6.88074	c
		CK20	55.7808	7.49812	c
			nitrite reductase	ug/g
		Treatment	Average	Deviation	Significance
		5a	12.1483	0.478519	c
		10a	15.0742	0.863178	b
		15a	14.0067	1.51157	b
		20a	18.9416	1.49507	a
		CK5	10.5593	0.892997	cd
		CK10	9.8418	0.737481	d
		CK20	7.93434	0.85031	e

## Sheet: Table3 
	Table 3 Correlations between soil organic N distribution (%) and N-mineralizing enzyme activities in the long-term continuous cropping cotton field
			Protease	Urease	Nitrate reductase	Nitrous reductase
		Amino acid N (%)	0.293	0.157	0.339	0.384
		Ammonium N (%)	-0.784*	-0.909**	-.867*	-0.794*
		Amino sugar N (%)	0.513	0.47	0.46	0.561
		Unidentified N (%)	0.346	0.608	0.384	0.333
		Insoluble N (%)	-0.546	-0.612	-0.55	-0.615
		Total organic N (%)	0.837*	0.854*	0.869*	0.882**
	The raw data of this table from figure1 and figure2 basic data

## Sheet: unpublished data
	ammonia nitrogen content in 0-40 cm soil layer
		Average	Deviation
	5a	4.98311	0.260175
	10a	5.74196	0.0338387
	15a	5.88821	0.301109
	20a	6.84841	0.25831
	CK5	4.34029	0.24209
	CK10	4.64226	0.157689
	CK20	5.22228	0.0786367
